# Supplementary material for: Evaluation of pharmaceutical care services in the Middle East Countries: a review of studies of 2013–2020
Source: Springer Nature journal article supplement (doi:10.1186/s12889-023-16199-1), 2023-07-17
Supplement: MOESM1 [file 25809144]

**Supplementary File : *Characterizations  
of the studies (n= 129)***

| <b>Authors/ Year</b>                        | <b>Location</b> | <b>Design</b>                                     | <b>Hospital<br/>characterization</b>                                                                                                                                                        | <b>Intervention<br/>by</b>         | <b>Unit</b>            | <b>Data collection</b>                                                                                                                                     | <b>Data<br/>analysis</b>             | <b>PCs Implemented</b>                                                                           | <b>Quality<br/>rating</b> | <b>Name of<br/>Journal</b>                          | <b>Impact<br/>Factor</b> |
|---------------------------------------------|-----------------|---------------------------------------------------|---------------------------------------------------------------------------------------------------------------------------------------------------------------------------------------------|------------------------------------|------------------------|------------------------------------------------------------------------------------------------------------------------------------------------------------|--------------------------------------|--------------------------------------------------------------------------------------------------|---------------------------|-----------------------------------------------------|--------------------------|
| Attalla Saleh<br>Abu-Oliem et al.<br>(2013) | Jordan          | Randomized<br>control trial                       | This ICU has 37 beds.<br>An average of 35<br>patients was admitted<br>every week from<br>internal medicine,<br>surgery, and traumatic<br>patients (for example,<br>road traffic accidents). | Clinical<br>pharmacist             | ICU                    | -The database was<br>collected from patients'<br>medical files.<br><br>-Interview with patients.<br><br>- Facilitated discussion<br>with physicians.       | Thematic<br>analysis                 | Resolving and<br>preventing DRPs.                                                                | High                      | Jordan Journal of<br>Pharmaceutical<br>Science      | 0.35                     |
| Linda M<br>Tahaineh et al.<br><br>(2018)    | Jordan          | A prospective<br>parallel<br>randomized<br>trial. | Outpatients clinics                                                                                                                                                                         | Clinical<br>pharmacist             | Outpatients<br>clinics | Data collected through<br>patients' interviews and<br>verbal recommendations<br>to physician's<br>concerning the<br>intervention group<br>management plan. | Thematic<br>analysis                 | Managing iron<br>deficiency anemia<br>patients.                                                  | High                      | International<br>Journal of<br>Pharmacy<br>Practice | 0.391                    |
| Yasmeen<br>AbuNaba'a et al.<br>(2019)       | Jordan          | A parallel<br>randomized<br>trial.                | Not determined                                                                                                                                                                              | Clinical<br>pharmacist             | Psychiatric<br>clinic  | Data collected through<br>patients' interviews and<br>recommendations<br>discussed with<br>physicians and<br>quaternary was made.                          | Descriptive<br>analysis.             | Counseling and<br>education<br>regarding<br>treatment,<br>adherence, and<br>self-care activities | High                      | Journal of<br>Evaluation in<br>Clinical Practice    | 1.681                    |
| Chung-Ying Lin<br>et al. (2017)             | Iran            | Randomized<br>control trial                       | (Five academic centers<br>in Tehran, two in<br>Qazvin and Ahvaz<br>each, one in Semnan,                                                                                                     | Well<br>prepared<br>practitioners. | 5 multiple<br>centers  | Facilitated discussion<br>groups and focus group                                                                                                           | Multilevel<br>linear mixed<br>models | Medication<br>adherence,<br>improving QoL,                                                       | High                      | Drugs and Aging<br>Journal                          | 2.381                    |

|                                          |        |                                       |                                                                                                                                                                                     |                      |                            |                                                                                              |                      |                                                                                                                |      |                                                          |       |
|------------------------------------------|--------|---------------------------------------|-------------------------------------------------------------------------------------------------------------------------------------------------------------------------------------|----------------------|----------------------------|----------------------------------------------------------------------------------------------|----------------------|----------------------------------------------------------------------------------------------------------------|------|----------------------------------------------------------|-------|
|                                          |        |                                       | Zanjan, and Tabriz each).                                                                                                                                                           |                      |                            |                                                                                              |                      | and reducing the mortality rate.                                                                               |      |                                                          |       |
| Salma M Bahnasawy et al. (2017)          | Egypt  | A prospective randomized study.       | Not determined                                                                                                                                                                      | Clinical pharmacist  | Pediatric clinic           | By using the Generic Core Scale Questionnaire and an interview with patients.                | Statistical analysis | Increasing awareness regards iron overload and enhancing the patient's outcome.                                | High | Basic and Clinical Pharmacology and Toxicology           | 3.176 |
| Rajaa A Al-Qudah et al. (2020)           | Jordan | A prospective randomized study.       | Outpatient clinic setting of the Jordan University Hospital in Amman, Jordan, the main health care provider in Jordan, with 600 beds and serving over 500 000 outpatients annually. | Clinical pharmacist  | Outpatient clinic          | Patient interview method via a questionnaire                                                 | Statistical analysis | Resolving TRP among patients with chronic diseases.                                                            | High | Journal of Evaluation in Clinical Practice               | 1.681 |
| Zahra Jahangard-Rafsanjani et al. (2015) | Iran   | Randomized control study              | Not determined.                                                                                                                                                                     | Community pharmacist | Endocrine clinic           | 5 follow-up visits and 5 phone calls) and recommended physician visits when necessary.       | Statistical analysis | Developing and delivering a diabetes support program for patients                                              | High | The Science of Diabetes self-management and Care Journal | 2.087 |
| Eylem Ilktac Korcegez et al. (2017)      | Cyprus | Randomized control study.             | The study was conducted with 152 patients at a 186-bed public hospital's outpatient diabetes clinic in Gazimagusa, Northern Cyprus.                                                 | Clinical pharmacist  | Outpatient diabetic clinic | Data were collected using questionnaires, medical reports, and the hospital's record system. | Statistical analysis | Achieving treatment goals in patients with DM, improving pts. outcomes, and medication adherence.              | High | Journal of Managed Care and Specialty Pharmacy           | 2.713 |
| Maguy Saffouh El Hajj et al. (2017)      | Qatar  | Prospective randomized control study. | Not determined.                                                                                                                                                                     | Pharmacist           | Ambulatory pharmacies      | Face to face structure interview.                                                            | Statistical analysis | Implanting and delivering the smoking program, reducing the rate of death, and preventing respiratory disease. | High | BMC Public Health                                        | 2.948 |

|                                |        |                                       |                                                                                                                                                                                                                                                              |                     |                 |                                                                                                  |                      |                                                                                                                                                            |      |                                            |       |
|--------------------------------|--------|---------------------------------------|--------------------------------------------------------------------------------------------------------------------------------------------------------------------------------------------------------------------------------------------------------------|---------------------|-----------------|--------------------------------------------------------------------------------------------------|----------------------|------------------------------------------------------------------------------------------------------------------------------------------------------------|------|--------------------------------------------|-------|
| Amir Sarayani et al. (2018)    | Iran   | Parallel randomized control study.    | Tehran University of Medical Sciences (conference hall and the drug information call center). This pharmacy is in the midtown area of Tehran, the capital city of Iran, and is the main pharmacy among 7 educational pharmacies affiliated with the College. | Pharmacist          | DIC             | Phone calls and discussion with physicians                                                       | Statistical analysis | Improving patient care activity, medication adherence, and DM parameters.                                                                                  | High | International Journal of Clinical Pharmacy | 1.692 |
| Mera Ababneh et al. (2019)     | Jordan | Prospective randomized control study. | Not determined                                                                                                                                                                                                                                               | Clinical pharmacist | Urology clinic  | Verbal communication with patients, questionnaires, and some discussion was with physicians      | Statistical analysis | Increasing medication adherence, education of patients, and improving lifestyle.                                                                           | Low  | International Journal of Clinical Pharmacy | 1.616 |
| Maryam Mehrpooya et al. (2018) | Iran   | Randomized control study              | Not determined.                                                                                                                                                                                                                                              | Pharmacists         | Cardiac unit    | Face to face and Morisky questionnaire                                                           | Statistical analysis | Increasing adherence to medications and educating the patients about their medications and disease.                                                        | Low  | Journal of Applied Pharmaceutical Science  | 0.62  |
| Amani Zidan et al. (2016)      | Qatar  | Prospective randomized control study  | The center is equipped with a 20-bed coronary care unit, a 12-bed cardiothoracic intensive care unit, a 24-bed surgical high dependency unit, and 60 ward beds with continuous telemetry monitoring rooms.                                                   | Clinical pharmacist | Cardiology unit | By reviewing the HH's medical records according to the study's inclusion and exclusion criteria. | Statistical analysis | Reviewing and reconciling patient's discharge medications, Documenting and resolving any identified discrepancies and DRP, and Providing the usual general | High | BMJ Open                                   | 2.496 |

|                              |              |                           |                                                                                                                                                                                                   |                             |                        |                                                                                  |                                      |                                                                                              |      |                                                               |       |
|------------------------------|--------------|---------------------------|---------------------------------------------------------------------------------------------------------------------------------------------------------------------------------------------------|-----------------------------|------------------------|----------------------------------------------------------------------------------|--------------------------------------|----------------------------------------------------------------------------------------------|------|---------------------------------------------------------------|-------|
|                              |              |                           |                                                                                                                                                                                                   |                             |                        |                                                                                  |                                      | discharge counseling.                                                                        |      |                                                               |       |
| Haitham Saeed et al. (2020)  | Egypt        | Randomized control study. | Not determined.                                                                                                                                                                                   | Well prepared practitioners | 3 different clinics    | A smartphone application was recorded with verbal communication.                 | Statistical analysis                 | Improving and educating patients about their use of the selected device.                     | Low  | Journal of Respiratory Care                                   | 2.012 |
| Maryam Mousavi et al. (2013) | Iran         | Randomized control study  | Not determined.                                                                                                                                                                                   | Clinical pharmacist         | Transplantati on ward. | Daily services were applied to patients according to the patient's health status | Statistical analysis                 | Providing well PN, maintain the natural status of patients, and improving clinical outcomes. | High | Journal of Support Care in Cancer                             | 2.698 |
| Amna Al-Hashar et al. (2018) | Oman         | Randomized control study. | A tertiary care academic hospital in Oman with a bed capacity of 500.                                                                                                                             | Pharmacist                  | Internal medical ward  | Electronic health records and interviews.                                        | Statistical analysis                 | Reducing medication errors and reconciliation on admission and discharge.                    | High | International Journal of Clinical Pharmacy                    | 1.692 |
| Ruba A Wishah et al. (2015)  | Jordan       | Randomized control study. | The diabetes clinic at JUH provides usual care services to more than 90 patients daily with regular follow-up clinic visits every 1–3 months, depending on the glycemic control for each patient. | Clinical pharmacist         | Diabetes clinic        | By using the structured interview guide, medical charts, and hospital computers. | Descriptive analysis                 | Controlling diabetic type 2 patients and evaluating patients' adherence to medication.       | High | Diabetes and Metabolic Syndrome: Clinical Research and Review | 0.672 |
| K Aljumah et al. (2015)      | Saudi Arabia | Randomized control study  | This city has a total population of more than 5,000,000 and one psychiatric hospital (Al-Amal Hospital; a total of 500 beds) is the main provider of psychiatric                                  | Pharmacist                  | Psychiatric clinic     | Applying intervention by a pharmacist and using a questionnaire.                 | Descriptive and comparative analysis | Improving adherence to medication, patient's outcome, and improving patient's knowledge.     | High | BMC Psychiatry                                                | 1.369 |

|                                  |        |                                      |                                                                                                                                  |                     |                             |                                                                                         |                      |                                                                                                                      |      |                                                                |       |
|----------------------------------|--------|--------------------------------------|----------------------------------------------------------------------------------------------------------------------------------|---------------------|-----------------------------|-----------------------------------------------------------------------------------------|----------------------|----------------------------------------------------------------------------------------------------------------------|------|----------------------------------------------------------------|-------|
|                                  |        |                                      | care for the entire population.                                                                                                  |                     |                             |                                                                                         |                      |                                                                                                                      |      |                                                                |       |
| Lana K. Salameh et al. (2019)    | Jordan | Randomized control study             | At the Jordan University Hospital (JUH), a 550 beds' tertiary teaching hospital located in Amman, the capital of Jordan.         | Pharmacist          | Internal medical ward       | Data collected from the patients' medical records, followed by interviewing the patient | Statistical analysis | Reducing medication discrepancies and improving patients' outcomes.                                                  | High | Journal of Pharmaceutical Health Services Research             | 0.287 |
| Radwa El Borolossy et al. (2014) | Egypt  | Prospective randomized control study | Not determined                                                                                                                   | Clinical pharmacist | Hemodialysis clinic         | Applying intervention by a pharmacist and using a questionnaire.                        | Statistical analysis | Reducing the risk of developing DTRPs                                                                                | High | Journal of the International Pediatrics Nephrology Association | 2.676 |
| Zina Tahsin Ali et al. (2019)    | Iraq   | Randomized control study             | Not determined                                                                                                                   | Pharmacist          | Endocrine clinic            | Face to face interview, telephone call, and questionnaire                               | Not reported         | Improving, reviewing a patient's health parameters and enhancing medication adherence                                | High | Annual Tropical Medicine and Public Health                     | 0.131 |
| Dvora Frankenthal et al. (2014)  | Israel | Parallel randomized control study    | The facility has 384 beds and is staffed by five physicians and one chief physician who is the medical director of the facility. | Pharmacist          | Geriatric unit              | Reviewing patients' medications and using specific scales.                              | Statistical analysis | Detecting inappropriate prescription, right treatment, and medications, enhancing clinical outcome and improving QoL | High | Journal of American Geriatric Society                          | 4.388 |
| Eman Ahmed Casper et al. (2019)  | Egypt  | Prospective randomized control study | Not determined                                                                                                                   | Clinical pharmacist | Cardiac rehabilitation unit | Data collected via both patient record and patient interview                            | Statistical analysis | Reducing DRPs, enhancing drug therapy and clinical outcome                                                           | High | Basic and Clinical Pharmacology and Toxicology                 | 2.651 |

|                                 |        |                                          |                |                     |                            |                                                                                         |                                               |                                                                                                                   |      |                                                              |       |
|---------------------------------|--------|------------------------------------------|----------------|---------------------|----------------------------|-----------------------------------------------------------------------------------------|-----------------------------------------------|-------------------------------------------------------------------------------------------------------------------|------|--------------------------------------------------------------|-------|
| Yassin, Harb Taha et al. (2020) | Iraq   | Prospective randomized clinical trial    | Not determined | Clinical pharmacist | Cardiac and internal wards | Motivational interview, medication review                                               | Statistical analysis                          | Reducing re-hospitalization, discrepancies and improving HRQoL and adherence to medications                       | Low  | Journal of Systematic Review Pharmacy                        | 2.479 |
| Bonyan Qudah et al. (2016)      | Jordan | Randomized control study                 | Not determined | Clinical pharmacist | Hemodialysis unit          | By automatic BP monitors that were equipped with the Fresenius® dialysis machines       | Statistical analysis                          | Managing and controlling BP in hemodialysis patients                                                              | High | International Journal of Clinical Pharmacy                   | 1.555 |
| Taha O. Mahwi et al. (2013)     | Iraq   | Prospective, randomized control study    | Not determined | Pharmacist          | Diabetes clinic            | Data of each patient were recorded in the patient data collection forms, questionnaire. | Statistical analysis and analytical analysis. | Controlling patients' parameters and reducing DTPs                                                                | Low  | International Journal of Pharmaceutical Science and Research | 0.27  |
| Hend K. Eldeib et al. (2019)    | Egypt  | Prospective, randomized control study    | Not determined | Pharmacist          | National cancer institute  | Using telephone follow up                                                               | Not reported                                  | Enhancing medication adherence, the safety of oral chemotherapy, patient survival, and utilizing health outcomes. | High | Journal of Telemedicine and e-Health                         | 2.385 |
| Basima A Almomani et al. (2017) | Jordan | Randomized control study                 | Not determined | Clinical pharmacist | Pediatrics unit            | The face-to-face interview was conducted and a questionnaire.                           | Statistical analysis                          | Controlling asthmatic health status and improving QoL                                                             | High | Journal of Patient Education and Counselling                 | 2.607 |
| Eman Ahmed Casper et al. (2016) | Egypt  | Interventional randomized clinical trial | Not determined | Clinical pharmacist | Cardiac unit               | Data collected via both patient record and patient interview                            | Statistical analysis                          | Enhancing patient outcome, educating patients, and increasing patient adherence to medications                    | Low  | Basic and Clinical Pharmacology and Toxicology               | 2.651 |

|                                      |        |                                       |                                                                                                                                                                              |                     |                     |                                                                                                                                  |                      |                                                                                                            |      |                                            |       |
|--------------------------------------|--------|---------------------------------------|------------------------------------------------------------------------------------------------------------------------------------------------------------------------------|---------------------|---------------------|----------------------------------------------------------------------------------------------------------------------------------|----------------------|------------------------------------------------------------------------------------------------------------|------|--------------------------------------------|-------|
| Sewar S Salmany et al. (2018)        | Jordan | Randomized control study              | The study was conducted at a not-for-profit, 170-bed, teaching cancer center that treats about 3500 new cancer patients each year in both inpatient and outpatient settings. | Pharmacist          | Oncology unit       | Telephone follow up, medication chart, and Likert scale                                                                          | Statistical analysis | Determining a patient's satisfaction after discharge.                                                      | High | Journal of Oncology Pharmacy Practice      | 1.603 |
| Sumaya Abuloha et al. (2016)         | Jordan | Prospective, randomized control study | The average number of patients visiting this clinic is about 70 patients/day, of these about 45 patients/day are diabetic, and most of them are T2DM.                        | Clinical pharmacist | Endocrine unit      | Patients' medical records and questionnaire                                                                                      | Statistical analysis | Enhancing medication adherence, outcome, and educating patients about their health status and medications. | High | Jordan Journal of Pharmaceutical Science   | 0.35  |
| Simin Dashti-Khavidaki et al. (2013) | Iran   | Randomized control study              | Not determined                                                                                                                                                               | Clinical pharmacist | Hemodialysis center | Patients' charts and prescriptions, interviews, and questionnaires.                                                              | Statistical analysis | Improving HRQoL, reducing the risk of hospitalization, and the rate of mortality.                          | High | International Journal of Clinical Pharmacy | 1.25  |
| Iman A Basheti et al. (2016)         | Jordan | Prospective, randomized control study | At two community pharmacies in Amman, Jordan. On average, each community pharmacy serves 60–70 patients per day.                                                             | Clinical pharmacist | Community pharmacy  | A validated pharmaceutical care tool was used, patient interviews, and by using the patient's medical records and questionnaire. | Statistical analysis | Assessing medication used by patients and managing TRPs.                                                   | High | International Journal of Clinical Pharmacy | 1.555 |
| Nour Faqee et al. (2020)             | Jordan | Prospective study                     | KHCC is a 350-bed, internationally accredited cancer center in Amman, Jordan, which provides comprehensive care to adult and pediatric                                       | Clinical pharmacist | Oncology unit       | Routine review of patients' profiles and recorded CPIs, recording forms                                                          | Statistical analysis | Optimizing patient therapy and reducing DRPs.                                                              | Fair | Journal of Oncology Pharmacy Practice      | 1.85  |

|                                 |        |                             |                                                                                                                                                                                            |                     |                                             |                                                                                                                                   |                                                                                                                        |                                                                                                                                                                                   |      |                                          |       |
|---------------------------------|--------|-----------------------------|--------------------------------------------------------------------------------------------------------------------------------------------------------------------------------------------|---------------------|---------------------------------------------|-----------------------------------------------------------------------------------------------------------------------------------|------------------------------------------------------------------------------------------------------------------------|-----------------------------------------------------------------------------------------------------------------------------------------------------------------------------------|------|------------------------------------------|-------|
|                                 |        |                             | patients for all types of cancer in Jordan and the region.                                                                                                                                 |                     |                                             |                                                                                                                                   |                                                                                                                        |                                                                                                                                                                                   |      |                                          |       |
| Naemeh Nikvarz et al. (2019)    | Iran   | Cross-sectional study       | The study was conducted in a 20-bed nephrology ward of a tertiary teaching hospital affiliated to Kerman University of Medical Sciences (KUMS).                                            | Clinical pharmacist | Nephrology ward                             | Survey                                                                                                                            | Statistical analysis                                                                                                   | Improving VTE prophylaxis administration                                                                                                                                          | Good | Europe Journal Hospital Pharmacy         | 0.892 |
| Mesut Sancar et al. (2015)      | Turkey | Pre-post intervention study | Not determined                                                                                                                                                                             | Clinical pharmacist | Hospitalized and chest clinic               | Using a list of accurate inhaler device use steps according to GOLD (the Global initiative for chronic Obstructive Lung Disease). | Statistical analysis                                                                                                   | Increasing patient adherence to regular therapy and educating COPD patients on using inhalers in a hospital setting                                                               | Fair | Europe Journal Hospital Pharmacy         | 0.432 |
| Tahrir Alnawayseh et al. (2020) | Jordan | Pre-post intervention study | Not determined                                                                                                                                                                             | Clinical pharmacist | Internal medicine clinic – respiratory ward | A structured interview was conducted and Morisky Medication Adherence Scale                                                       | Statistical analysis                                                                                                   | Educating on their use of inhaler device, enhancing medication adherence, and improving QoL                                                                                       | Good | Jordan Journal of Pharmaceutical Science | 0.270 |
| Ahmet S Boşnak et al. (2018)    | Cyprus | Prospective study           | The study was performed in the oncology department on in- and outpatients at Near East University Hospital, which is the biggest and leading medical facility in Nicosia, Northern Cyprus. | Clinical pharmacist | Oncology department                         | Appropriate interventions for each identified DRP were interviewed and discussed with the prescriber directly.                    | Statistical analysis and Graph Pad In Stat (version 3.00 for Windows 95, Graph Pad Software, San Diego California USA, | Identify the prevalence and nature of the DRPs encountered with the relevant factors and to understand the benefits to the treatment of the oncology pharmacists in this process. | Good | Journal of Oncology Pharmacy Practice    | 1.484 |



|                                           |        |                                        |                                                                                                                                                                                          |                                                                  |                                        |                                                                                                                                                                                                                                                                                |                                                                                                |                                                                                                                                                                                         |              |                                                      |       |
|-------------------------------------------|--------|----------------------------------------|------------------------------------------------------------------------------------------------------------------------------------------------------------------------------------------|------------------------------------------------------------------|----------------------------------------|--------------------------------------------------------------------------------------------------------------------------------------------------------------------------------------------------------------------------------------------------------------------------------|------------------------------------------------------------------------------------------------|-----------------------------------------------------------------------------------------------------------------------------------------------------------------------------------------|--------------|------------------------------------------------------|-------|
|                                           |        |                                        |                                                                                                                                                                                          |                                                                  |                                        |                                                                                                                                                                                                                                                                                | www.graphp<br>ad.com).                                                                         |                                                                                                                                                                                         |              |                                                      |       |
| Birand Nevzat<br>Et al. (2019)            | Cyprus | Prospective<br>study                   | Near East University<br>Hospital is an<br>institution affiliated<br>with Near East<br>University, Nicosia,<br>and North Cyprus.                                                          | Clinical<br>pharmacist                                           | Oncology<br>department                 | Patient education was<br>provided face-to-face,<br>and written information<br>was tailored to the<br>individual patient's<br>chemotherapy protocol.<br><br>Beliefs about Medicines<br>Questionnaire (BMQ)<br>and The Morisky Green<br>Levine Test (MGLT)<br>were used          | Statistical<br>analysis                                                                        | Evaluate patient<br>medication<br>adherence and<br>beliefs and the<br>potential impact of<br>counseling by a<br>pharmacist on<br>cancer patient<br>medication beliefs<br>and adherence. | Good         | Journal of<br>Oncology<br>Pharmacy<br>Practice       | 1.85  |
| Majdoleen AL<br>Alawneh. Et al.<br>(2020) | Jordan | Randomized<br>Control Study            | The study was<br>conducted in three<br>large Jordanian cities:<br>Amman, Zarqa, and<br>Mafraq, where The<br>majority of the<br>refugees from Syria<br>residing in these cities.          | Clinical<br>Pharmacists                                          | Syrian<br>refugees                     | From the information<br>collected, the pharmacist<br>was able to identify the s<br>for each participant.<br>Besides, during home<br>visits, two<br>questionnaires were<br>completed by the<br>participants themselves,<br>thus self-evaluating their<br>QoL and anxiety scores | Statistical<br>analysis                                                                        | Evaluating Syrian<br>refugee's QoL and<br>anxiety scores.                                                                                                                               | High quality | Pharmacy<br>Practice Journal                         | 1.49  |
| Yara R. Al Tall,<br>Et al (2020)          | Jordan | An exploratory<br>qualitative<br>study | The study was<br>conducted at Forearms<br>of Change Centre.<br><br>The Forearms of<br>Change Center is<br>located in<br>Amman/Jordan and<br>works on encouraging<br>HIV/AIDS patients to | Trained<br>researcher<br>and qualified<br>clinical<br>Pharmacist | The center of<br>HIV/ AIDS<br>patients | A semi-structured<br>questionnaire, so open<br>and semi-structured<br>questions were used in<br>the interviews. Face-to-<br>face interviews were<br>conducted in private<br>rooms to avoid any<br>interruptions or<br>distractions and to make<br>participants comfortable.    | -Recorded<br>interviews<br>were<br>transcribed<br>verbatim.<br><br>- Descriptive<br>statistics | The barriers and<br>facilitators of<br>adherence to ART<br>among HIV<br>positive patients in<br>Jordan and to<br>assess their need<br>for pharmaceutical<br>care services.              | Fair         | The International<br>Journal of<br>Clinical Practice | 2.444 |

|                                  |        |                           |                                                                                                              |                                  |                                                                                           |                                                                                                                                                                                                                                                                                                                                                          |                        |                                                                                                                  |      |                                                |       |
|----------------------------------|--------|---------------------------|--------------------------------------------------------------------------------------------------------------|----------------------------------|-------------------------------------------------------------------------------------------|----------------------------------------------------------------------------------------------------------------------------------------------------------------------------------------------------------------------------------------------------------------------------------------------------------------------------------------------------------|------------------------|------------------------------------------------------------------------------------------------------------------|------|------------------------------------------------|-------|
|                                  |        |                           | cohabit with their disease and give them positive support and help.                                          |                                  |                                                                                           |                                                                                                                                                                                                                                                                                                                                                          |                        |                                                                                                                  |      |                                                |       |
| Fadi Jarab, Et al. (2020)        | Jordan | Retrospective study       | Data were collected by referring to information technology departments at King Abdullah University Hospital. | Pharmacist                       | In patients who were clinically stable and received IV antibiotics for more than 24 hours | Data were collected retrospectively using electronic medical records and clinical notes, which included patient's file number, age, gender, height, weight, vital signs at admission, WBC count and serum creatinine at admission time, name of prescribed IV antibiotic and its dose regimen and duration, microbiology reports and sites of infection. | Descriptive statistics | Ensuring appropriate use of antibiotics in different hospital settings                                           | Fair | The International Journal of Clinical Practice | 2.444 |
| Kinda T. Alkoudsi, Et al. (2019) | Jordan | Randomized control trial. | Community pharmacies (five pharmacies in Amman and five in Damascus).                                        | Clinical pharmacists             | Women diagnosed with PCOS                                                                 | An intervention was done by Clinical pharmacists and then the Beck Anxiety inventory questionnaire was distributed.                                                                                                                                                                                                                                      | Statistical analysis   | The effect of a PCOS pharmaceutical care service on QOL for women diagnosed with PCOS living in Syria and Jordan | High | Journal of Education in Clinical Practice      | 1.681 |
| Bushra Abdul Hadi, Et al (2015)  | Jordan | Randomized control trial. | Specialty hospital in Jordan.<br><br>All the children were assessed for their ASA physical status.           | -Surgeon<br>-Clinical Pharmacist | All the children were assessed for their ASA physical status.                             | - Provided the patients with simple information about the disease and drug therapy pre-, intra- and post-operatively.<br><br>- All patients received a standard anesthetic protocol.                                                                                                                                                                     | Statistical analysis   | This study applied a pharmaceutical care intervention to tonsillectomy.                                          | High | International Journal of Clinical Pharmacy     | 1.339 |

|                                      |              |                       |                                                                                                                                                                |                      |                                                                                                                                                                                                 |                                                                                                         |                        |                                                                                                                                                                              |      |                                                  |       |
|--------------------------------------|--------------|-----------------------|----------------------------------------------------------------------------------------------------------------------------------------------------------------|----------------------|-------------------------------------------------------------------------------------------------------------------------------------------------------------------------------------------------|---------------------------------------------------------------------------------------------------------|------------------------|------------------------------------------------------------------------------------------------------------------------------------------------------------------------------|------|--------------------------------------------------|-------|
|                                      |              |                       |                                                                                                                                                                |                      |                                                                                                                                                                                                 | - Quantitative measurements made during the operation                                                   |                        |                                                                                                                                                                              |      |                                                  |       |
| Hailah Aldosari, Et al. (2020)       | Kuwait       | Cross-sectional study | All governmental hospitals and polyclinics and private pharmacies in all the five health regions of Kuwait (Capital, Hawalli, Ahmadai, Farwaniyah, and Jahra). | Researchers          | Pharmacists working in governmental and private sectors                                                                                                                                         | Data were collected via self-administered questionnaires.                                               | Statistical analysis   | Pharmacists' attitudes towards continuing education and to investigate the perceived barriers that hinder pharmacists from being involved in continuing education activities | Fair | Saudi Pharmaceutical Journal                     | 2.879 |
| Salmeen D Babelghaith, Et al. (2020) | Saudi Arabia | Retrospective study   | This retrospective study was conducted among inpatients at the Ministry of Health hospital in Jazan, a region in southwestern Saudi Arabia.                    | Pharmacists          | Ten departments: medical, surgical and orthopedic, pediatric, obstetric gynecology, delivery, operation room, anesthesiology, recovery room, adult intensive care, and neonatal intensive care. | Data collected depending on the implementation of Inpatient Pharmacy Intervention Reports File (IPIRF). | Descriptive statistics | The incidence of drug-related problems (DRPs) in different inpatient departments along with the medical team response to pharmacist's action                                 | Good | Journal of Risk Management and Healthcare Policy | 0.968 |
| Esra Kucuk, Et al. (2020)            | Turkey       | Prospective study     | This study was conducted at the Hacettepe University Hospital oncology outpatient clinic which                                                                 | Clinical pharmacists | Oncology department                                                                                                                                                                             | -On each visit to the clinic during the study period, a clinical pharmacist would review the patients'  | Descriptive statistics | The incidence of drug-related problems in patients receiving targeted                                                                                                        | Fair | Journal of Oncology Pharmacy Practice            | 1.85  |

|                                 |        |                                           |                                                                                                                                                                                                                                                                                              |                      |                                            |                                                                                                                                                                                                                                                                       |                      |                                                                                                                                            |      |                                                     |       |
|---------------------------------|--------|-------------------------------------------|----------------------------------------------------------------------------------------------------------------------------------------------------------------------------------------------------------------------------------------------------------------------------------------------|----------------------|--------------------------------------------|-----------------------------------------------------------------------------------------------------------------------------------------------------------------------------------------------------------------------------------------------------------------------|----------------------|--------------------------------------------------------------------------------------------------------------------------------------------|------|-----------------------------------------------------|-------|
|                                 |        |                                           | provided care to around 80–100 patients per day and ran for five days between 8 am and 4 pm                                                                                                                                                                                                  |                      |                                            | medical records and ask the patient questions about their health status and drug therapy while they were receiving their treatment infusions.<br><br>- Identified DRPs were categorized using the Pharmaceutical Care Network Europe (PCNE) v.7 classification system |                      | chemotherapy and/or immunotherapy, and demonstrate the impact of a clinical pharmacist in an outpatient oncology care setting.             |      |                                                     |       |
| Nesligul Ozdemir. Et al. (2020) | Turkey | Cross-sectional study                     | This study was carried out in a tertiary care hospital's pediatric bone marrow transplantation unit                                                                                                                                                                                          | Clinical pharmacists | Pediatric bone marrow transplantation unit | Drug-related problems in this study were identified by using Pharmaceutical Care Network Europe.                                                                                                                                                                      | Statistical analysis | To demonstrate the importance of clinical pharmacists' participation in the detection, prevention, and management of drug-related problems | Fair | Journal of Clinical and Experimental Health Science | 2.644 |
| Lobna S Mostafa, Et al. (2020)  | Egypt  | Prospective pre–post-interventional study | -The study was conducted at the emergency hospital within Ain Shams University Hospital.<br><br>- The emergency hospital, which includes a variety of surgical disciplines, is designed for the care of patients who are admitted for surgical purposes without prior appointment, either by | Clinical pharmacists | Emergency sector                           | -Reviewing medications orders<br><br>- Categorizing errors according to the National Coordinating Council for Medication Error Reporting and Prevention (NCC MERP).                                                                                                   | Statistical analysis | Evaluate the impact of pharmacist-led educational implementations in reducing medication errors                                            | Fair | Journal of Public Health                            | 1.648 |

|                                 |        |                                                                                     |                                                                                                                                                                                                                                                                                                                                                                                                                                                                                                         |                      |                                                                      |                                                                          |                      |                                                                                                                                                                           |      |                                          |       |
|---------------------------------|--------|-------------------------------------------------------------------------------------|---------------------------------------------------------------------------------------------------------------------------------------------------------------------------------------------------------------------------------------------------------------------------------------------------------------------------------------------------------------------------------------------------------------------------------------------------------------------------------------------------------|----------------------|----------------------------------------------------------------------|--------------------------------------------------------------------------|----------------------|---------------------------------------------------------------------------------------------------------------------------------------------------------------------------|------|------------------------------------------|-------|
|                                 |        |                                                                                     | their means or by ambulance.                                                                                                                                                                                                                                                                                                                                                                                                                                                                            |                      |                                                                      |                                                                          |                      |                                                                                                                                                                           |      |                                          |       |
| Linda Tahaineh, Et al. (2020)   | Jordan | Two methodologies: a structured interview technique and a pre-and post-intervention | Obstetrics and gynecology clinics as well as family-planning clinics in public health centers in North Jordan                                                                                                                                                                                                                                                                                                                                                                                           | Clinical pharmacists | Obstetrics and gynecology clinics as well as family-planning clinics | A validated closed- and open-ended questionnaire and educational session | Statistical analysis | Measuring the effect of clinical pharmacist's intervention regarding the risks and benefits associated with the use of combined oral contraceptive (COC) pills.           | Fair | Jordan Journal of Pharmaceutical Science | 0.270 |
| Sayer I Al-Azzam, Et al. (2016) | Jordan | The study was a non-randomized trial                                                | <p>-At Alsarh Medical Health Center in the north of Jordan.</p> <p>-This health center is a comprehensive governmental healthcare facility that provides primary healthcare services to a population of about 65 000.</p> <p>-Services include emergency care, specialized outpatient clinics in family medicine, internal medicine, pediatrics, dermatology, and obstetrics/gynecology.</p> <p>-The staff at the center comprises 10 physicians and 15 nurses and supporting staff. It services an</p> | Clinical pharmacists | The research interviewed randomly selected patients                  | Interview                                                                | Statistical analysis | Assessing patients' DRPs, proposed appropriate clinical interventions to physicians, and provided appropriate patient counseling to promote adherence and patient safety. | Good | Journal of International Health          | 1.797 |

|                                |        |                                           |                                                                                                                                                                                                         |                      |                          |                                                                                                                                                                                                               |                      |                                                                                                                                                |      |                                                    |       |
|--------------------------------|--------|-------------------------------------------|---------------------------------------------------------------------------------------------------------------------------------------------------------------------------------------------------------|----------------------|--------------------------|---------------------------------------------------------------------------------------------------------------------------------------------------------------------------------------------------------------|----------------------|------------------------------------------------------------------------------------------------------------------------------------------------|------|----------------------------------------------------|-------|
|                                |        |                                           | average of 100 patients per day.                                                                                                                                                                        |                      |                          |                                                                                                                                                                                                               |                      |                                                                                                                                                |      |                                                    |       |
| Shadi Farsaei, Et al. (2014)   | Iran   | Prospective pre-post-interventional study | The study setting was a 60-bed infectious diseases ward of Imam Khomeini hospital, a multispecialty health care university facility, affiliated to Tehran University of Medical Sciences, Tehran, Iran. | Clinical pharmacists | Infectious diseases ward | - Interventions including insulin, hypoglycemic, and nutritional management were written in the chart of patients by clinical pharmacists.<br><br>-Then all data were filled into the specific questionnaire. | Statistical analysis | The impact of the clinical pharmacist interventions on the glycemic control                                                                    | Good | Journal of Infection in Developing Countries       | 0.703 |
| Iman A Basheti, Et al. (2018)  | Jordan | Randomized control trial.                 | Jordan University Hospital, Amman, Jordan.                                                                                                                                                              | Clinical pharmacists | Outpatient clinic        | - The clinical pharmacist interviewed patients in both groups at their homes. For patients who refused the home visit, assessments were completed at the clinic.<br><br>-Questionnaire                        | Statistical analysis | Identifying treatment-related problems (TRPs) through home visits, assessing type and frequency of TRPs, and eventual effect of resolving TRPs | High | Journal of Pharmaceutical Health Services Research | 0.189 |
| Iman A Basheti, Et al. (2016)  | Jordan | Randomized control trial.                 | Jordan University Hospital, Amman, Jordan.                                                                                                                                                              | Clinical pharmacists | Outpatient clinic        | - The clinical pharmacist interviewed patients in both groups at their homes. For patients who refused the home visit, assessments were completed at the clinic.<br><br>-Questionnaire                        | Statistical analysis | Identifying treatment-related problems (TRPs) through home visits, assessing type and frequency of TRPs, and eventual effect of resolving TRPs | High | Journal of Pharmacotherapy                         | 3.196 |
| Kamel Abdelaziz, Et al. (2015) | Egypt  | Prospective study                         | In a general ICU that contains 22 beds in Riyadh Care Hospital, Saudi Arabia.                                                                                                                           | Consultants          | ICU                      | Data collected by recording patients' info, DRPs, the cause of admission, and other related information.                                                                                                      | Statistical analysis | Identifying and categorizing drug-related problems (DRPs)                                                                                      | Fair | Europe Journal of Hospital Pharmacy                | 0.892 |

|                                  |              |                           |                                                                                                                                                                                                                                                                                                                                                                                                              |                                      |                                                                                  |                                                                                                          |                      |                                                                                                                                          |      |                                                                    |       |
|----------------------------------|--------------|---------------------------|--------------------------------------------------------------------------------------------------------------------------------------------------------------------------------------------------------------------------------------------------------------------------------------------------------------------------------------------------------------------------------------------------------------|--------------------------------------|----------------------------------------------------------------------------------|----------------------------------------------------------------------------------------------------------|----------------------|------------------------------------------------------------------------------------------------------------------------------------------|------|--------------------------------------------------------------------|-------|
| Amal Akour, Et al. (2017)        | Jordan       | Randomized control trial. | Women who were visiting community pharmacies or fertility, obstetrics, and gynecology outpatient clinics                                                                                                                                                                                                                                                                                                     | Pharmacists                          | Community pharmacies or fertility, obstetrics, and gynecology outpatient clinics | Booklet and through the questionnaire.                                                                   | Statistical analysis | The effect of a pharmacist-provided information booklet on increasing the knowledge of Jordanian women about safe and effective OCP use. | High | The European Journal of Contraception and Reproductive health Care | 1.382 |
| Ayla M. Tourkmani, Et al. (2018) | Saudi Arabia | Randomized control trial. | <p>-The study was conducted in Al-Wazarat Chronic Diseases Center, a division of the Al-Wazarat Health Care (WHC) Family Medicine Center.</p> <p>-The Chronic Diseases Center consists of 12 specialized clinics, primarily for patients with T2DM, hypertension, dyslipidemia, and bronchial asthma, in addition to a procedures room and support services such as pharmacy, laboratory, and radiology.</p> | Clinical pharmacists and physicians. | The Chronic Diseases Center.                                                     | The integrated care program by reviewing the patient charts and arranging appointments with specialties. | Statistical analysis | Assessing the impact of such a program on glycemic control and cardiovascular risk factors.                                              | High | BMC Family Practice                                                | 1.332 |
| Razan Adnan Batta, Et al. (2018) | Jordan       | Randomized control trial. | Not determined                                                                                                                                                                                                                                                                                                                                                                                               | Clinical pharmacist                  | Pregnant patients of gestational age 20–28 weeks with diabetes                   | By using questionnaire and face-to-face interviews                                                       | Statistical analysis | Evaluate the role of a clinical pharmacist in the selection of the appropriate medical                                                   | High | International Journal of Clinical Pharmacy                         | 1.692 |

|                                         |              |                                           |                                                                                                                                                                                   |             |                                                                                                   |                                                                                                                     |                                             |                                                                                                                                                                                                                                                     |      |                                               |       |
|-----------------------------------------|--------------|-------------------------------------------|-----------------------------------------------------------------------------------------------------------------------------------------------------------------------------------|-------------|---------------------------------------------------------------------------------------------------|---------------------------------------------------------------------------------------------------------------------|---------------------------------------------|-----------------------------------------------------------------------------------------------------------------------------------------------------------------------------------------------------------------------------------------------------|------|-----------------------------------------------|-------|
|                                         |              |                                           |                                                                                                                                                                                   |             | (type 1, type 2, or GDM)                                                                          |                                                                                                                     |                                             | intervention for patients with hyperglycemia in pregnancy                                                                                                                                                                                           |      |                                               |       |
| Abdulaziz Saleh Almulhim, Et al. (2019) | Saudi Arabia | Retrospective pre-post intervention study | Banner-University Medical Center South is a tertiary care teaching hospital with annual ED visits of 45,000.                                                                      | pharmacists | Emergency department (ED)                                                                         | Reviewing the patient's charts, then a structured data collection tool (Excel) was used to perform data collection. | Both descriptive and inferential statistics | Evaluating the performance of our ED pharmacist urine culture follow-up and compare it to the nurse practitioner (NP)-driven follow-up in terms of the appropriateness of chosen antibiotics and, inappropriately treated asymptomatic bacteriuria. | Good | Journal of Pharmaceutical Policy and Practice | 0.644 |
| Mohammed Almzeiny, Et al. (2020)        | Saudi Arabia | Cross-sectional study                     | The study was conducted at PSMMC, a 1,350-bed tertiary care referral hospital for members of the Saudi Arabian armed forces and their families. PSMMC is in Riyadh, Saudi Arabia. | pharmacists | The neonatal intensive care unit (NICU), the high dependency unit (HDU), and pediatric nephrology | Questionnaire                                                                                                       | Descriptive statistics                      | Exploring the perceptions and satisfaction of stakeholders (physicians, nurses, and pharmacists) regarding services provided by the patient care area pharmacist (PCAP) initiative.                                                                 | Fair | Tropical Journal of Pharmaceutical Research   | 0.504 |
| Adil A. Mahmoud, Et al. (2017)          | Saudi Arabia | An interventional, non-randomized,        | King Faisal Hospital in Taif City, Kingdom of Saudi Arabia.                                                                                                                       | pharmacists | Outpatient cardiology clinic                                                                      | Questionnaire and face to face interview.                                                                           | Descriptive statistics                      | Assessing the impact of the practice of PCs on patient outcomes: blood pressure                                                                                                                                                                     | Fair | International Journal of Pharmaceutical       | 0.22  |



|                                      |         |                                                                  |                                                                                                                                                                            |                      |                                    |                                                                                                                         |                      |                                                                                                                                                                                        |      |                                                |       |
|--------------------------------------|---------|------------------------------------------------------------------|----------------------------------------------------------------------------------------------------------------------------------------------------------------------------|----------------------|------------------------------------|-------------------------------------------------------------------------------------------------------------------------|----------------------|----------------------------------------------------------------------------------------------------------------------------------------------------------------------------------------|------|------------------------------------------------|-------|
|                                      |         | uncontrolled study                                               |                                                                                                                                                                            |                      |                                    |                                                                                                                         |                      | control, knowledge of the disease, and adherence to medications.                                                                                                                       |      | Science Review and Research                    |       |
| Majdoleen Al Alawneh, Et al. (2019)  | Jordan  | Prospective randomized single-blinded intervention-control study | In three main cities in Jordan (Amman, Mafraq, Zarqa), where the majority of the Syrian refugees reside.                                                                   | Clinical pharmacists | Syrian refugees' clinics in Jordan | Data were collected via 2 home visits.                                                                                  | Statistical analyses | Identifying the type and frequency of TRPs amongst Syrian 92 refugees living in Jordan, and exploring the impact of the HMMR service on reducing the 93 number of the identified TRPs. | Good | Research in Social and Administrative Pharmacy | 2.844 |
| Mohamad Ali Hijazi, Et al. (2020)    | Lebanon | Cross-sectional study                                            | Community pharmacies                                                                                                                                                       | Pharmacists          | Community pharmacies               | Face to face interview and questionnaire.                                                                               | Statistical analyses | The role of community pharmacists in weight management                                                                                                                                 | Fair | BMC Health Service Research                    | 0.995 |
| Bushra Hassan Marouf, Et al. (2020)  | Iraq    | An interventional randomized study.                              | At the dialysis centers of Kirkuk General Hospital- Directorate of Health in Kirkuk city; a hospital with 250 beds for hospitalization of chronic kidney disease patients. | Clinical pharmacists | Anemic patients on hemodialysis    | Reviewing patients' medications and all the interventions                                                               | Statistical analyses | The effect of pharmacist interventions in optimizing management of anemia associated with chronic kidney disease                                                                       | High | Journal of Young Pharmacy                      | 0.180 |
| Rashida Muhammad Umar, Et al. (2020) | Turkey  | Prospective study                                                | Marmara University Teaching and Research Hospital Medical Oncology.                                                                                                        | Clinical pharmacists | Oncology department                | Reviewing patients' health status and medication and using (PCNE) Classification Scheme for Drug-Related Problems V6.2. | Statistical analyses | Intervening in identified drug-related problems.                                                                                                                                       | Good | International Journal of Clinical Pharmacy     | 1.616 |

|                                      |              |                                 |                                                                                                                      |                      |                                      |                                                                                                                            |                      |                                                                                                                                                      |      |                                               |       |
|--------------------------------------|--------------|---------------------------------|----------------------------------------------------------------------------------------------------------------------|----------------------|--------------------------------------|----------------------------------------------------------------------------------------------------------------------------|----------------------|------------------------------------------------------------------------------------------------------------------------------------------------------|------|-----------------------------------------------|-------|
| Miri Potlog Shchory, Et al. (2020)   | Israel       | Quantitative intervention study | Three public hospitals                                                                                               | Researchers          | Internal medicine                    | Questionnaire                                                                                                              | Statistical analyses | The effect of an intervention program on the knowledge and attitudes among physicians and nurses regarding ADRs reporting.                           | Fair | Journal of Pharmacoepdimology and Drug Safety | 2.918 |
| MF Najjar, Et al. (2017)             | Saudi Arabia | Pre-post interventional study   | At King Abdulaziz Medical City in Riyadh, Saudi Arabia.                                                              | Clinical pharmacists | Medical wards for Geriatric patients | -Reviewing baseline data about the current prescribing pattern of PIMs for geriatric inpatients and an educational program | Statistical analyses | Reducing the incidence of PIMs among hospitalized geriatric patients.                                                                                | Good | Journal of Pharmacoepdimology and Drug Safety | 2.314 |
| Erdem Topal, Et al. (2020)           | Turkey       | Cross-sectional study           | Three centers located in different parts of Turkey were included.                                                    | Researchers          | Community pharmacists                | Face to face interview and questionnaire                                                                                   | Statistical analyses | Indicating that pharmacists should be included in the training program and be provided continuous training on the use of pMDIs with a spacer device. | Fair | Journal of Asthma                             | 1.899 |
| Fikret Vehbi İZZETTİN, Et al. (2019) | Turkey       | Cross-sectional study           | Not determined                                                                                                       | Clinical pharmacists | Outpatient cardiology clinic.        | An interview with the questionnaire.                                                                                       | Statistical analyses | Determining the effectiveness of pharmacist consultation, education, and intervention on each patient's therapeutic results.                         | Fair | Journal of Research in Pharmacy               | 3.90  |
| Elham Alshammari. (2019)             | Saudi Arabia | Prospective study               | The study was conducted at Prince Sultan Cardiac Center in Riyadh, Kingdom of Saudi Arabia, a 160 full-capacity beds | Clinical pharmacists | Cardiac center                       | Reviewing and recoded hospitalized patients' files                                                                         | Statistical analyses | Clinical pharmacist role in preventing or decreasing drug-related adverse events and                                                                 | Fair | International Research Journal of Pharmacy    | 0.765 |

|  |  |  |                                                                                                                                     |  |  |  |  |                                               |  |  |  |
|--|--|--|-------------------------------------------------------------------------------------------------------------------------------------|--|--|--|--|-----------------------------------------------|--|--|--|
|  |  |  | instituted for hospitalized patients with cardiac problems or scheduled procedures and also serve outpatient and emergency clinics. |  |  |  |  | eventually decrease hospitalization and costs |  |  |  |
|--|--|--|-------------------------------------------------------------------------------------------------------------------------------------|--|--|--|--|-----------------------------------------------|--|--|--|

|                                       |        |                          |                                                                                                                                                                                                                         |                          |                               |                                                                         |                      |                                                                                                                   |      |                                                |       |
|---------------------------------------|--------|--------------------------|-------------------------------------------------------------------------------------------------------------------------------------------------------------------------------------------------------------------------|--------------------------|-------------------------------|-------------------------------------------------------------------------|----------------------|-------------------------------------------------------------------------------------------------------------------|------|------------------------------------------------|-------|
| Kinda T Alkoudsi et al. (2018)        | Jordan | Randomized control trial | Females diagnosed with PCOS, living in the national capital cities of Syria (Damascus) and Jordan (Amman), were approached while visiting community pharmacies for study recruitment.                                   | Clinical pharmacist      | Females diagnosed with PCOS   | -The database was collected from patients and by using a questionnaire. | Statistical analysis | The impact of a pharmaceutical care service for PCOS on participants' anxiety and depression scores and severity. | High | Research in Social and administrative Pharmacy | 2.844 |
| Shaymaa Abdalwahed Abdulameer. (2018) | Iraq   | Cross-sectional study    | Three areas from two large distract zone named Al-Kharkh (west of the Tigris: four distract zone) and Al-Rusafa (east of the Tigris: six distract zones).                                                               | Pharmacist               | Community pharmacies          | Data collected through a face-to-face interview.                        | Statistical analysis | Assess the diabetes knowledge and pharmaceutical care practice among registered and unregistered pharmacists      | Fair | Journal of Applied Pharmaceutical Science      | 0.252 |
| Amr S. Shalaby. (2017)                | Egypt  | Cross-sectional study    | The study was conducted in Menoufia Governorate, which is located in the Nile Delta, in the northern part of the country, and to the north of Cairo. It consists of nine administrative centers that include 10 cities. | Health care professional | Department of Neuropsychiatry | Data collected through a questionnaire.                                 | Statistical analysis | Exploring the attitude of a sample of community pharmacists and their assistants toward psychiatric patients      | Fair | Journal of Middle East Current Psychiatry      | 0.15  |

|                               |              |                       |                                                                                                                                                                                                                                                     |             |                                                        |                                         |                                        |                                                                                                                                         |      |                                                      |       |
|-------------------------------|--------------|-----------------------|-----------------------------------------------------------------------------------------------------------------------------------------------------------------------------------------------------------------------------------------------------|-------------|--------------------------------------------------------|-----------------------------------------|----------------------------------------|-----------------------------------------------------------------------------------------------------------------------------------------|------|------------------------------------------------------|-------|
| Khizra Sultana, Et al. (2016) | Saudi Arabia | Cross-sectional study | The Pharmaceutical department is divided into outpatient, inpatient, and clinical pharmacy services. In Riyadh, we have 33 clinical pharmacists and 175 pharmacists involved in outpatient, inpatient, and discharge counseling services.           | Pharmacists | Saudi Pharmacists.                                     | Data collected through a questionnaire. | Descriptive analysis                   | Assessing the attitude, motivators, and barriers of pharmacists to take part in PBR.                                                    | Fair | Journal of Pharmaceutical Policy and Practice        | 0.292 |
| Noor Alsalmiy, Et al. (2017)  | Qatar        | Retrospective         | Rumailah Hospital (RH) is a tertiary public hospital in Qatar that provides several healthcare services for sub-acute and long-term care patients, including surgical services for ear, nose, and throat (ENT), ophthalmology, and plastic surgery. | Pharmacists | All ADR reports from all RH units.                     | A paper-based reporting form.           | Descriptive and inferential statistics | Reviewing ADR reports                                                                                                                   | Fair | Journal of Drugs and Therapy perspective             | 0.21  |
| Ramzi Shawahna. (2020)        | Palestine    | Cross-sectional study | Healthcare facilities.                                                                                                                                                                                                                              | Pharmacists | Patients admitted to or visiting healthcare facilities | Questionnaire                           | Statistical analysis                   | Developing and achieving consensus on what activities and services to use as KPIs to capture and measuring the impact of pharmacists in | Fair | Evidence-Based Complementary and Alterative Medicine | 2.64  |

|                                |              |                       |                                                                                                                                                                                                                                                        |                      |                              |               |                      |                                                                                                                                                               |      |                                           |       |
|--------------------------------|--------------|-----------------------|--------------------------------------------------------------------------------------------------------------------------------------------------------------------------------------------------------------------------------------------------------|----------------------|------------------------------|---------------|----------------------|---------------------------------------------------------------------------------------------------------------------------------------------------------------|------|-------------------------------------------|-------|
|                                |              |                       |                                                                                                                                                                                                                                                        |                      |                              |               |                      | integrative healthcare facilities.                                                                                                                            |      |                                           |       |
| Hani MJ Khojah. (2019)         | Saudi Arabia | Cross-sectional study | Private community pharmacies (353 pharmacies) and their locations in Madinah                                                                                                                                                                           | Pharmacists          | Private community pharmacies | Questionnaire | Descriptive analysis | Investigating the level of provision of customer education regarding the effects of sedating antihistamines on driving skills by private community pharmacies | Fair | Journal of International Medical Research | 1.287 |
| Anan S Jarab Et al. (2020)     | Jordan       | Cross-sectional study | Queen Alia Heart Institute at Royal Medical Services (RMS). This clinic is considered as one of the largest hospitals in Jordan that provides healthcare services to more than 100 angina patients daily. All patients who had IHD for at least 1 year | Clinical pharmacists | Outpatients cardiac clinic   | Questionnaire | Descriptive analysis | Evaluating HRQOL and to explore the factors associated with poor HRQOL among patients with angina                                                             | Good | Quality of Life Research Journal          | 2.392 |
| Rania E. Ghanem, Et al. (2020) | Palestine    | Cross-sectional study | Community pharmacies located in cities, villages, and refugee camps in different governorates were visited.                                                                                                                                            | Pharmacists          | Community pharmacies         | Questionnaire | Descriptive analysis | Exploring their knowledge, attitude, and practice for acne management.                                                                                        | Fair | The International Journal of Dermatology  | 1.794 |

|                                      |              |                       |                                                                                                                                                                                                                                  |             |                                    |                                                           |                      |                                                                                                                                       |      |                                          |       |
|--------------------------------------|--------------|-----------------------|----------------------------------------------------------------------------------------------------------------------------------------------------------------------------------------------------------------------------------|-------------|------------------------------------|-----------------------------------------------------------|----------------------|---------------------------------------------------------------------------------------------------------------------------------------|------|------------------------------------------|-------|
| Nour Makkaoui, Et al. (2020)         | Lebanon      | Cross-sectional study | Licensed community pharmacies in Lebanon                                                                                                                                                                                         | Pharmacists | Community pharmacies               | Data was collected through an interview and questionnaire | Statistical analysis | Exploring the knowledge, attitude, and practice that community pharmacists of Lebanon hold concerning checking for drug interactions. | Fair | Journal of Public Health                 | 1.648 |
| Anan S. Jarab, Et al. (2020)         | Jordan       | Cross-sectional study | Queen Alia Heart Institute in the Royal Medical Services. This clinic is considered as one of the largest hospitals in Jordan that provides healthcare services to more than 100 angina patients daily.                          | Pharmacists | Outpatients cardiac clinic         | Questionnaire                                             | Descriptive analysis | Evaluating medication adherence and exploring the factors associated with medications non-adherence among patients with angina        | Fair | Jordan Journal of Pharmaceutical Science | 0.270 |
| Dhfer Mahdi AlShayban, Et al. (2020) | Saudi Arabia | Cross-sectional study | Hospital pharmacies of King Fahd Hospital of the University located in the city of Khobar and, Al Zahra Hospital in Qatif city, as well as community pharmacies located in cities of Khobar, Dammam, and Qatif served as venues. | Pharmacists | Hospital and community pharmacies. | Questionnaire                                             | Descriptive analysis | Evaluating patients' satisfaction and WTP for pharmacist counseling                                                                   | Fair | Journal of Frontiers in Pharmacology     | 4.225 |

|                              |              |                                    |                                                               |                     |                                   |               |                      |                                                                                                          |      |                                                     |       |
|------------------------------|--------------|------------------------------------|---------------------------------------------------------------|---------------------|-----------------------------------|---------------|----------------------|----------------------------------------------------------------------------------------------------------|------|-----------------------------------------------------|-------|
| Kholoud Dweib, Et al. (2020) | Palestine    | Cross-sectional study              | MOH primary health-care clinics of Bethlehem and North Hebron | Pharmacists         | Kidney transplant clinic          | Questionnaire | Descriptive analysis | Measuring QoL among renal transplant patients                                                            | Fair | Saudi Journal of Kidney Disease and Transplantation | 0.72  |
| F I Al-Saikhan. (2020)       | Saudi Arabia | Prospective, Cross-sectional study | Prince Sattam Bin Abdulaziz University Hospital in Alkharj.   | Clinical pharmacist | Outpatient anticoagulation clinic | Questionnaire | Descriptive analysis | Examining the association between WTA and HRQOL in patients being treated with warfarin in Saudi Arabia. | Fair | Nigerian Journal of Clinical Practice               | 0.634 |

|                            |        |                       |                                                                                                                                                                                                                                                                                            |                     |                       |                                                                                           |                      |                                                                                                                                                          |      |                                            |       |
|----------------------------|--------|-----------------------|--------------------------------------------------------------------------------------------------------------------------------------------------------------------------------------------------------------------------------------------------------------------------------------------|---------------------|-----------------------|-------------------------------------------------------------------------------------------|----------------------|----------------------------------------------------------------------------------------------------------------------------------------------------------|------|--------------------------------------------|-------|
| Günay Arsoy, Et al. (2018) | Cyprus | Cross-sectional study | The included only experienced community pharmacists with 5 or more years' experience as stipulated by Turkish and Northern Cyprus Pharmacists' Association's norms.                                                                                                                        | Trained pharmacists | Community pharmacies  | -The database was collected from patients and by face-to-face interview and questionnaire | Statistical analysis | Evaluating the effectiveness of the pharmacist-led educational intervention for improving patients' QoL and perceived symptom severity.                  | Good | Medicina Journal                           | 2.861 |
| Maram Gamal Katoue. (2020) | Kuwait | Cross-sectional study | Kuwait's governmental healthcare system is organized into three levels of healthcare delivery: they are primary, secondary, and tertiary. Primary healthcare is delivered through healthcare centers distributed across the different areas of the State. Secondary healthcare is provided | Pharmacist          | Governmental hospital | Data were collected from participants using focus group interviews                        | Thematic analysis    | Exploring the perceptions of hospital pharmacists about the enablers and challenges to expanding their scope of practice to include direct patient care. | Fair | Journal of Evaluation in Clinical Practice | 1.684 |

|                                    |              |                                       |                                                                                                                                                               |                                             |                                                                         |                                                                          |                                               |                                                                                                                                                                      |      |                                            |       |
|------------------------------------|--------------|---------------------------------------|---------------------------------------------------------------------------------------------------------------------------------------------------------------|---------------------------------------------|-------------------------------------------------------------------------|--------------------------------------------------------------------------|-----------------------------------------------|----------------------------------------------------------------------------------------------------------------------------------------------------------------------|------|--------------------------------------------|-------|
|                                    |              |                                       | through six general hospitals, while tertiary healthcare is delivered through many specialized hospitals and health centers.                                  |                                             |                                                                         |                                                                          |                                               |                                                                                                                                                                      |      |                                            |       |
| Elif Ertuna, Et al. (2019)         | Turkey       | Retrospective                         | In the acute geriatric ward (10 beds) of a government-run 1,800-bed tertiary university hospital in Turkey.                                                   | Clinical pharmacists                        | Geriatric ward                                                          | Data were collected by reviewing medication reports                      | Statistical analysis                          | Defining and classifying DRPs, pharmacist interventions, and frequently prescribed medications concerning possible DRPs in patients admitted to the geriatric ward.  | Fair | Journal of Clinical Intervention in Aging  | 1.0   |
| Afsaneh Vazin, Et al. (2018)       | Iran         | Prospective                           | Namazi Hospital, affiliated to Shiraz University of Medical Sciences (Shiraz, Iran) is a general tertiary referral center with 50 wards and nearly 1000 beds. | Trained pharmacist and Clinical pharmacists | Clinical wards of Namazi Hospital                                       | Data collected from the Hospital Information System and patient records. | Statistical analysis                          | Evaluating the impact of an intervention by the pharmaceutical care unit on the use pattern of high-value medications and their direct costs in a referral hospital. | Fair | BMC Health Service Research Journal        | 1.057 |
| Mostafa A Sayed Ali, Et al. (2018) | Egypt        | Prospective                           | Assiut University Hospital. The inpatient wards have a capacity of 48 beds and the ICU unit comprises 18 beds.                                                | Clinical pharmacists                        | In-patient wards and intensive care unit of the Department of Neurology | By reviewing all patients' drug charts.                                  | Statistical analysis and descriptive analysis | Identifying common DRPs in neurology and document clinical pharmacists' medication-related interventions.                                                            | Fair | International Journal of Clinical Pharmacy | 1.692 |
| Reem A Bahmaid, Et al. (2018)      | Saudi Arabia | pre-test/post-test quasi-experimental | Not determined                                                                                                                                                | Trained research coordinator                | Three tertiary care settings: King Fahad Medical City,                  | Data were collected by using a questionnaire                             | Statistical analysis                          | Assessing the impact of research educational intervention on                                                                                                         | Fair | Cureus                                     | 1.15  |



|                                          |              |                                                |                                                                                                                                                        |                      |                                                                                       |                                                                                                                               |                                  |                                                                                                                                                               |      |                                                  |       |
|------------------------------------------|--------------|------------------------------------------------|--------------------------------------------------------------------------------------------------------------------------------------------------------|----------------------|---------------------------------------------------------------------------------------|-------------------------------------------------------------------------------------------------------------------------------|----------------------------------|---------------------------------------------------------------------------------------------------------------------------------------------------------------|------|--------------------------------------------------|-------|
|                                          |              | interventional study                           |                                                                                                                                                        |                      | King Faisal Specialist Hospital and Research Center, and Prince Sultan Cardiac Center |                                                                                                                               |                                  | knowledge, attitudes, perceptions, and pharmacy practices towards evidence-based medicine                                                                     |      |                                                  |       |
| Pallivalapilla Abdul Rouf, Et al. (2018) | Qatar        | Cross-sectional study                          | Not determined                                                                                                                                         | Pharmacists          | Hospitals, community pharmacies                                                       | Data were collected by using a questionnaire                                                                                  | Descriptive analysis             | Determining the knowledge and practice characteristics of pharmacists in Qatar about medicines use in pregnancy.                                              | Fair | Estran Mediterranean Health Journal              | 0.694 |
| Abdikarim Mohamed Abdi, Et al. (2018)    | Cyprus       | Prospective                                    | Community pharmacists working in pharmacies in North Cyprus. There was 190 licensed pharmacies majority operating in the 5 main cities in North Cyprus | Clinical pharmacists | Community pharmacies                                                                  | Data were collected by using a questionnaire                                                                                  | Statistical analysis             | Assessing community pharmacist's perceptions and practice of pharmaceutical care                                                                              | Fair | Journal of Pharmaceutical Research International | 0.07  |
| Ata Mahmoodpor, Et al. (2018)            | Iran         | Cross-sectional study                          | Shohada University Hospital.<br>Not determined                                                                                                         | Clinical pharmacists | ICU                                                                                   | Questionnaire                                                                                                                 | Descriptive statistical analysis | Assessing clinical pharmacy services in the intensive care unit (ICU)                                                                                         | Good | Journal of Research in Pharmacy Practice         | 0.00  |
| Muath Fahmi Najjar, Et al. (2018)        | Saudi Arabia | Prospective and Pre-Post interventional study. | Department of Medicine at King Abdulaziz Medical City.<br>Not determined                                                                               | Clinical pharmacists | Medical wards<br>(Hospitalized geriatric patients)                                    | Data was reviewed baseline data about the current prescribing pattern of PIMs for geriatric inpatients data obtained from the | Statistical analysis             | Assessing the effectiveness of a combined intervention program comprising an educational and clinical pharmacist intervention to reduce the incidence of PIMs | Good | Therapeutic and Clinical Risk Management         | 0.725 |

|                                       |        |                       |                                                                                                                                                                                                                                                                                                                                            |                      |                                                   |                                                                |                      |                                                                                                                                                                                           |      |                                             |       |
|---------------------------------------|--------|-----------------------|--------------------------------------------------------------------------------------------------------------------------------------------------------------------------------------------------------------------------------------------------------------------------------------------------------------------------------------------|----------------------|---------------------------------------------------|----------------------------------------------------------------|----------------------|-------------------------------------------------------------------------------------------------------------------------------------------------------------------------------------------|------|---------------------------------------------|-------|
|                                       |        |                       |                                                                                                                                                                                                                                                                                                                                            |                      |                                                   | Hospital Information System                                    |                      | among hospitalized geriatric patients.                                                                                                                                                    |      |                                             |       |
| Shaymaa Abdalwahed Abdulameer. (2018) | Iraq   | Cross-sectional study | Baghdad city has two large district areas named Al-Kharkh and Al-Rusafa. The random cluster sampling method was used to select three areas from each.                                                                                                                                                                                      | Pharmacist           | Community pharmacies                              | Data were collected by using a questionnaire                   | Statistical analysis | Assessing the pharmaceutical care practice among registered pharmacists.                                                                                                                  | Fair | International Journal of COPD               | 3.157 |
| Huda G El-Refae, Et al. (2017)        | Jordan | Prospective           | The University of Jordan Hospital.<br><br>Not determined                                                                                                                                                                                                                                                                                   | Clinical pharmacists | Cardiology ward                                   | By telephone call or hospital visit for a medication refill.   | Statistical analysis | Assessing physician acceptance of clinical pharmacist suggestions; and determining the impact on costs to patients.                                                                       | Good | Tropical Journal of Pharmaceutical Research | 0.48  |
| Haider Al-Baghdadi, Et al. (2017)     | Cyprus | Prospective           | Near East University Hospital, which is the largest and leading medical facility in Nicosia, Northern Cyprus. The services of the hospital are performed within a compound comprising over 56 thousand square meters of indoor space including 209 private, single-patient rooms, 8-operating theatres, 30-bed Intensive Care Unit, 17-bed | Clinical pharmacists | Cardiology and cardiovascular surgery departments | By reviewing patients' medications using PCNE to identify DRPs | Statistical analysis | Assessing the implementation of ward-based clinical pharmacy services in cardiovascular clinics and describing the prevalence and nature of encountered DRPs with the associated factors. | Fair | International Journal of Clinical Pharmacy  | 1.508 |

|                               |              |                                   |                                                                                                                                                                                                                                                                                                                                 |                      |                           |                                                                                                                                    |                                           |                                                                                                                                                 |      |                                             |       |
|-------------------------------|--------------|-----------------------------------|---------------------------------------------------------------------------------------------------------------------------------------------------------------------------------------------------------------------------------------------------------------------------------------------------------------------------------|----------------------|---------------------------|------------------------------------------------------------------------------------------------------------------------------------|-------------------------------------------|-------------------------------------------------------------------------------------------------------------------------------------------------|------|---------------------------------------------|-------|
|                               |              |                                   | Neonatal Intensive Care Unit, and advanced laboratory.                                                                                                                                                                                                                                                                          |                      |                           |                                                                                                                                    |                                           |                                                                                                                                                 |      |                                             |       |
| Ziyad Alrabiah, Et al. (2017) | Saudi Arabia | Prospective cross-sectional study | Not determined                                                                                                                                                                                                                                                                                                                  | Clinical pharmacists | Community pharmacists     | Data were collected by using a questionnaire                                                                                       | Both descriptive and analytic statistics  | Evaluating knowledge of CPs about medication safety during pregnant                                                                             | Fair | Saudi Pharmaceutical Journal                | 3.11  |
| Rana Abu Farha, Et al. (2017) | Jordan       | Cross-sectional study             | Jordan University Hospital.<br><br>Not determined                                                                                                                                                                                                                                                                               | Clinical pharmacists | Cardiac outpatient clinic | Data were collected by using a questionnaire                                                                                       | Both descriptive and statistical analysis | Identifying the influence of different types of DRPs on the HRQOL of hypertensive patients.                                                     | Fair | Journal of Pharmacy Practice                | 0.451 |
| Turki Assiri, Et al. (2017)   | Saudi Arabia | Prospective                       | -At Prince Sultan Cardiac Center (PSCC).<br><br>- PSCC is a specialized healthcare center that provides comprehensive cardiovascular services to all armed forces personnel, their dependents, and other patients referred to the center for further evaluation and specialized treatment and includes about 190 beds dedicated | Pharmacists          | Cardiac center            | Data were collected by reviewing the patient's records, medical and medication history, diagnosis, and discharge (treatment) plan. | Descriptive analysis                      | Determine the impact of pharmacist's counseling and review of discharge prescriptions for patients discharged from a specialized cardiac center | Fair | Tropical Journal of Pharmaceutical Research | 0.444 |

|                                      |              |               |                                                                                                                                                                                                                                                                                                                                                                         |                      |                                                                         |                                                                                                                           |                                  |                                                                                                                                                                                      |      |                                          |       |
|--------------------------------------|--------------|---------------|-------------------------------------------------------------------------------------------------------------------------------------------------------------------------------------------------------------------------------------------------------------------------------------------------------------------------------------------------------------------------|----------------------|-------------------------------------------------------------------------|---------------------------------------------------------------------------------------------------------------------------|----------------------------------|--------------------------------------------------------------------------------------------------------------------------------------------------------------------------------------|------|------------------------------------------|-------|
|                                      |              |               | to adult and pediatric cardiac patients.                                                                                                                                                                                                                                                                                                                                |                      |                                                                         |                                                                                                                           |                                  |                                                                                                                                                                                      |      |                                          |       |
| Aida Sefidani Forough, Et al. (2017) | Iran         | Prospective   | Amiral Momenin General Hospital                                                                                                                                                                                                                                                                                                                                         | Pharmacists          | Elderly diabetic patients (visited the hospital's outpatient department | Data were collected through interviews using researcher-administered questionnaires as well as patients' medical records. | Descriptive statistical analysis | Evaluating the impact of pharmacist-conducted educational intervention on reducing errors related to inappropriate insulin pen use.                                                  | Fair | Journal of Research in Pharmacy Practice | 0.00  |
| Ali A. ALMITWAZ I, Et al. (2017)     | Saudi Arabia | Retrospective | At Prince Sultan Cardiac Center (PSCC).<br><br>- PSCC is a specialized healthcare center that provides comprehensive cardiovascular services to all armed forces personnel, their dependents, and other patients referred to the center for further evaluation and specialized treatment and includes about 190 beds dedicated to adult and pediatric cardiac patients. | Clinical pharmacists | Cardiac center                                                          | Data were extracted from the hospital's electronic documentation.                                                         | Descriptive statistical analysis | Assessing the clinical pharmacist interventions and probable impact of these interventions in cost minimization by reducing direct medication costs at a specialized cardiac center. | Fair | Latin American Journal of Pharmacy       | 0.401 |

|                                     |         |                                   |                                                                     |                      |                                                |                                                                                         |                                  |                                                                                                                                                  |      |                                             |       |
|-------------------------------------|---------|-----------------------------------|---------------------------------------------------------------------|----------------------|------------------------------------------------|-----------------------------------------------------------------------------------------|----------------------------------|--------------------------------------------------------------------------------------------------------------------------------------------------|------|---------------------------------------------|-------|
| Nibal R Chamoun, Et al. (2016)      | Lebanon | Retrospective                     | At a teaching hospital                                              | Clinical pharmacists | Cardiology and infectious diseases departments | By reviewing patients' documentation and reporting sheets                               | Descriptive statistical analysis | Showing the impact of pharmacy interventions in reducing MRPs                                                                                    | Fair | International Journal of Clinical Pharmacy  | 1.555 |
| Khawla Abu Hammour, Et al. (2016)   | Jordan  | Cross-sectional study             | At four tertiary hospitals (two private and two teaching hospitals) | Pharmacists          | Two private and two teaching hospitals         | Data was collected by using a questionnaire                                             | Descriptive analysis             | Gaining an insight into hospital pharmacists' current practice and perceptions towards medicine reconciliation and identifying common challenges | Fair | Journal of Evaluation in Clinical Practice  | 1.25  |
| Farzaneh Foroughinia, Et al. (2016) | Iran    | Prospective cross-sectional study | Shahid Faghighi Hospital                                            | Clinical pharmacists | Neurology ward                                 | Checked the patients' files and pharmacotherapy sheets and categorized DRPs using PCNE. | Descriptive analysis             | The role of the clinical pharmacist in the detection and prevention of these drug problems and evaluated the frequency and type of DRPs          | Fair | Journal of Research in Pharmacy Practice    | 0.00  |
| Laika Gökçekuş, Et al. (2016)       | Cyprus  | Prospective                       | Four community pharmacies in North Cyprus.                          | Clinical pharmacists | Community pharmacies                           | Data was collected by using form and PCNE classification.                               | Statistical analysis             | Investigate the role of the community pharmacist in identifying, preventing, and resolving drug-related problems (DRPs)                          | Good | Tropical Journal of Pharmaceutical Research | 0.48  |

|                                      |              |                       |                                                                                                         |                      |                                                                                                         |                                                                                                                             |                      |                                                                                                                                                                  |      |                                            |       |
|--------------------------------------|--------------|-----------------------|---------------------------------------------------------------------------------------------------------|----------------------|---------------------------------------------------------------------------------------------------------|-----------------------------------------------------------------------------------------------------------------------------|----------------------|------------------------------------------------------------------------------------------------------------------------------------------------------------------|------|--------------------------------------------|-------|
| Hani Abdelaziz, Et al. (2016)        | Qatar        | Retrospective         | Hamad General Hospital.<br><br>Not determined                                                           | Clinical pharmacists | Emergency department                                                                                    | Data were collected by reviewing patient profiles and an electronic system was used to record the interventions recommended | Descriptive analysis | Characterizing the contributions of clinical pharmacists in a short stay unit of ED to implement and scale-up the service to all ED areas in the future.         | Fair | International Journal in Clinical Pharmacy | 1.555 |
| Maguy Saffouh El Hajj, Et al. (2016) | Qatar        | Cross-sectional study | Public and private ambulatory care clinics, in outpatient hospital pharmacies, and community pharmacies | Pharmacists          | Public and private ambulatory care clinics, in outpatient hospital pharmacies, and community pharmacies | Data was collected by using a questionnaire                                                                                 | Statistical analysis | Describing pharmacists' attitudes towards their involvement in CVD prevention and to assess their perceived barriers to the provision of CVD prevention services | Fair | International Journal in Clinical Pharmacy | 1.555 |
| Amal K. Suleiman, Et al. (2016)      | Saudi Arabia | Cross-sectional study | Not determined                                                                                          | Pharmacists          | Community pharmacists                                                                                   | Data was collected by using a questionnaire                                                                                 | Descriptive analysis | Exploring pharmacists' attitudes regarding pharmaceutical care in chronic kidney disease (CKD) and end-stage renal disease (ESRD) patients.                      | Fair | Archives of Pharmacy Practice              | 0.252 |
| Maguy Saffouh El Hajj, Et al. (2016) | Qatar        | Cross-sectional study | Community Pharmacies                                                                                    | Clinical Pharmacists | Community Pharmacies                                                                                    | Data was collected by using a questionnaire                                                                                 | Statistical analysis | Examining the extent of pharmaceutical care practice and the barriers to pharmaceutical care provision                                                           | Good | Journal of Evaluation in Clinical Practice | 1.681 |

|                                         |              |                       |                                                                                                                                                          |                      |                                                                                                         |                                                                                                       |                                   |                                                                                                                          |      |                                                           |       |
|-----------------------------------------|--------------|-----------------------|----------------------------------------------------------------------------------------------------------------------------------------------------------|----------------------|---------------------------------------------------------------------------------------------------------|-------------------------------------------------------------------------------------------------------|-----------------------------------|--------------------------------------------------------------------------------------------------------------------------|------|-----------------------------------------------------------|-------|
| Gholamhosse in Mehralian, Et al. (2015) | Iran         | Cross-sectional study | Community Pharmacies                                                                                                                                     | Pharmacists          | Community Pharmacies                                                                                    | Data was collected by using a questionnaire                                                           | Descriptive analysis              | Evaluating pharmacists' practice and attitude toward pharmaceutical care (PhC) and present barriers                      | Fair | Journal of Pharmaceutical Health services Research        | 0.270 |
| Niaz Al-Somai, Et al. (2014)            | Saudi Arabia | Retrospective         | The hospital is a tertiary center that provides CCU, CSICU, Cardiac, Hematology, ICU, Medical, Neuroscience, Oncology, and specialized surgery services. | Clinical pharmacists | CCU, CSICU, Cardiac, Hematology, ICU, Medical, Neuroscience, Oncology, and specialized surgery services | Data were collected by reviewing the medical chart, lab tests, and culture reports                    | Statistical analysis              | Evaluating the role of clinical pharmacist and ID interventions in optimizing antimicrobial therapy.                     | Fair | Saudi Pharmaceutical Journal                              | 1     |
| Richard Hooper, Et al. (2014)           | Qatar        | Prospective           | The study was conducted in four primary health care clinics                                                                                              | Pharmacists          | Primary health care clinics                                                                             | Data were collected by reviewing documented information of patients and by using PCNE classification. | Statistical analysis              | Characterizing and analyze interventions documented by pharmacists in outpatient pharmacies                              | Fair | International Journal Clinical Pharmacy                   | 1.616 |
| Dalal M. Al-Taweel, Et al. (2013)       | Kuwait       | Cross-sectional study | Community pharmacies                                                                                                                                     | Pharmacists          | Community pharmacies                                                                                    | Data were collected using a questionnaire and an interview.                                           | Descriptive and thematic analysis | Identifying pharmacists' potential contributions to the delivery of pharmaceutical care to patients with type 2 diabetes | Fair | International Journal of Diabetes in Developing Countries | 0.525 |

|                                     |              |                       |                                                                                                                       |                      |                          |                                                                                                                  |                                      |                                                                                                                                                 |      |                                            |      |
|-------------------------------------|--------------|-----------------------|-----------------------------------------------------------------------------------------------------------------------|----------------------|--------------------------|------------------------------------------------------------------------------------------------------------------|--------------------------------------|-------------------------------------------------------------------------------------------------------------------------------------------------|------|--------------------------------------------|------|
| Salah M AbuRuz, Et al. (2013)       | Jordan       | Pre-Post intervention | At the nephrology wards (10 beds) of one of the largest general teaching hospitals in Jordan.                         | Clinical pharmacists | Nephrology wards         | Data were screened patients' medical files                                                                       | Statistical analysis                 | Implementing and evaluating the impact of pharmaceutical care service for hospitalized chronic kidney disease (CKD) patients                    | Good | International Journal of Clinical Pharmacy | 1.25 |
| Mohammed S. Alsultan, Et al. (2013) | Saudi Arabia | Cross-sectional study | Hospital pharmacy                                                                                                     | Clinical pharmacists | Hospital pharmacy        | Data were collected by a questionnaire                                                                           | Descriptive statistical              | Describing and characterize the trends in pharmacist's monitoring of medication therapy, and describe the monitoring activities of pharmacists. | Fair | Saudi Pharmaceutical Journal               | 1    |
| Hosseini Khalili, Et al. (2013)     | Iran         | Prospective           | At 60-bed infectious diseases ward of Imam Hospital, a multispecialty health care university setting in Tehran, Iran. | Clinical pharmacists | Infectious diseases ward | Data were collected by a questionnaire and medical charts of the patients                                        | Descriptive statistical analysis.    | Impact of clinical pharmacy interventions on decreasing direct medication costs                                                                 | Fair | European Journal of Internal Medicine      | 3.66 |
| Maram G Katoue, Et al. (2013)       | Kuwait       | Cross-sectional study | Community pharmacies                                                                                                  | Pharmacists          | Community pharmacies     | Data were collected via a face-to-face structured interview of the pharmacists using a pre-tested questionnaire. | Descriptive and comparative analysis | The role of community pharmacists in the care of patients with metabolic syndrome.                                                              | Fair | International Journal of Clinical Pharmacy | 1.25 |



|                                  |        |                                                   |                                                                                                                          |                                   |                                       |                                                                                                                                            |                                               |                                                                                                 |      |                                                  |       |
|----------------------------------|--------|---------------------------------------------------|--------------------------------------------------------------------------------------------------------------------------|-----------------------------------|---------------------------------------|--------------------------------------------------------------------------------------------------------------------------------------------|-----------------------------------------------|-------------------------------------------------------------------------------------------------|------|--------------------------------------------------|-------|
| Nadir Yağcına, Et al. (2019)     | Turkey | Prospective study                                 | University hospital.<br>Not determined                                                                                   | Clinical pharmacist               | Psychiatric ward                      | The data was collected by using a specific scale and an interview.                                                                         | Statistical analysis                          | Evaluating whether drug education during the discharging period affects compliance.             | Fair | International Clinical Psychopharmacology        | 3.098 |
| Emre KARA, Et al. (2019)         | Turkey | A prospective, cross-sectional study              | At the Infectious Diseases Outpatient Clinic of the Hacettepe University Adult Hospital.<br>Not determined               | Clinical pharmacist and physician | Infectious Diseases Outpatient Clinic | A face-to-face interview with a clinical pharmacist. PCNE Classification V 7.0 was used to classify incident drug-related problems (DRPs). | Statistical analysis                          | Determining DRPs and to evaluate clinical pharmacist interventions among PLWHA                  | Fair | Turkish Journal of Medical Science               | 0.717 |
| Ceylan Paksoy, Et al. (2018)     | Turkey | Prospective study                                 | At the oncology outpatient clinic located in Istanbul.<br>Not determined                                                 | Clinical pharmacist               | Oncology outpatient clinic            | Data was obtained from the patient's records and medication.                                                                               | Statistical analysis                          | Evaluating potentially inappropriate medication use in elderly patients with cancer.            | Fair | Journal of Oncology Pharmacy Practice            | 1.85  |
| Kamer TECEN-YUCEL, Et al. (2018) | Turkey | A descriptive, cross-sectional, prospective study | At the medical oncology outpatient clinic of a University Oncology Hospital. The clinic is run by two consultant doctors | Clinical pharmacist               | Oncology outpatient clinic            | Data was obtained from the patient's records.                                                                                              | Descriptive analysis and statistical analysis | To identify and evaluate drug-drug interactions and adverse effects related to TKIs in patients | Fair | International Journal of Hematology and Oncology | 1.992 |

|                                   |        |                     |                                                                                                      |                      |                              |                                                                                              |                      |                                                                                                                                                      |      |                                     |       |
|-----------------------------------|--------|---------------------|------------------------------------------------------------------------------------------------------|----------------------|------------------------------|----------------------------------------------------------------------------------------------|----------------------|------------------------------------------------------------------------------------------------------------------------------------------------------|------|-------------------------------------|-------|
| Fikret V. Izzettin, Et al. (2017) | Turkey | Prospective study   | At the oncology unit in one of the Teaching and Research Hospital in Istanbul.<br><br>Not determined | Clinical pharmacist  | Oncology unit                | Data were collected from the medical records of the patients and face- to – face interview.  | Statistical analysis | Assessing the occurrence of drug-related problems and the importance of the effective provision of patient education and appropriate recommendations | Fair | Marmara Pharmaceutical Journal      | 0.31  |
| Songül Tezcan, Et al. (2016)      | Turkey | Prospective study   | At the outpatient chemotherapy unit of Marmara University Pendik Training and Research Hospital      | Clinical pharmacists | Outpatient chemotherapy unit | Data was obtained from the patient's records and an interview.                               | Statistical analysis | Determining and evaluate the pharmaceutical care needs and quality of life of patients with colorectal cancer.                                       | Fair | Europe Journal of Hospital Pharmacy | 0.538 |
| SuleApikoglu-Rabus, Et al. (2016) | Turkey | Prospective study   | Not determined                                                                                       | Pharmacists          | Pharmacy                     | Data were collected by using a questionnaire, patients records, and a face-to-face interview | Statistical analysis | Describing drug-related problems in patients with asthma and COPD                                                                                    | Fair | Journal of Respiratory Medicine     | 3.237 |
| A. Selcuk, Et al. (2015)          | Turkey | Retrospective study | Not determined                                                                                       | Clinical pharmacists | Internal medicine            | Data was obtained from the patient's records.                                                | Statistical analysis | The impact of services, including medication reconciliation and medication review, on the hospital admission process for elderly patients            | Fair | Pharmazic                           | 1.37  |

|                                      |              |                               |                                                                                                                                                                   |                      |                              |                                                                                              |                                               |                                                                                                                                                                                                                  |      |                                            |       |
|--------------------------------------|--------------|-------------------------------|-------------------------------------------------------------------------------------------------------------------------------------------------------------------|----------------------|------------------------------|----------------------------------------------------------------------------------------------|-----------------------------------------------|------------------------------------------------------------------------------------------------------------------------------------------------------------------------------------------------------------------|------|--------------------------------------------|-------|
| Abdelrahman G . Tawfk, Et al. (2020) | Egypt        | Simulated client random study | Community pharmacies                                                                                                                                              | Pharmacists          | Community pharmacies         | Data obtained from the interviews                                                            | Descriptive analysis                          | Investigate the quality of community pharmacies management of self-medication requests of tetracycline for pregnant women.                                                                                       | Good | International Journal of Clinical Pharmacy | 1.616 |
| Bashayr Alsuwayni, Et al. (2020)     | Saudi Arabia | Prospective study             | At an academic hospital.<br><br>Not determined                                                                                                                    | Clinical pharmacists | Diabetes clinic              | Data was collected by using patient electronic health records.                               | Descriptive analysis                          | Evaluating diabetes-related health outcomes in a pharmacist-led diabetes clinic in terms of HgbA1C level, guideline-recommended routine screenings, medication adherence, and biomarkers of other comorbidities. | Fair | Saudi Pharmaceutical Journal               | 2.879 |
| Abdel-Hameed I. Ebid, Et al. (2020)  | Egypt        | Prospective study             | Ahmed Maher Teaching Hospital, in Cairo, Egypt. The outpatient clinic provides usual care services daily with regular follow up clinic visits every 1 to 3months, | Clinical pharmacists | Diabetes outpatient clinics. | Data was collected for each patient through an interview, lab reading, and hospital records. | Descriptive analysis and statistical analysis | Investigating the impact of the clinical pharmacist interventions on glycemic control and other health-related clinical outcomes in patients with type 2 diabetes                                                | Good | Hospital Pharmacy Sage Journal             | 0.55  |
